# Supplementary material for: Oxygen vacancies on CuGa2 catalysts enhance CO2 reduction to CO
Source: Royal Society of Chemistry journal article supplement (doi:10.1039/d4se01026d), 2024-01-01
Supplement: d4se01026d1.pdf [file d4se01026d1.pdf]

# Oxygen vacancies on CuGa<sub>2</sub> catalysts Enhances CO<sub>2</sub> Reduction to CO

Jiangfeng Mou <sup>a</sup>, Jin Hu <sup>a,\*</sup>, Tianyou Chen <sup>a,c\*</sup>, Kaizhao Wang<sup>a</sup>, Kaijun Wang <sup>a</sup>, WeiJun  
Zhang <sup>a</sup>, Shuai Wu <sup>b</sup>, Jin Shi <sup>b</sup>, Pengchong Zhao <sup>b</sup>.

- a. College of Materials Science and Engineering, Kunming University of Science and Technology, 121 Street, Wenchang Road 68, Kunming 650093, China
- b. State Key Laboratory of Complex Nonferrous Metal Resources Clean Utilization, College of Metallurgy and Energy Engineering, Kunming University of Science and Technology, 121 Street, Wenchang Road 68, Kunming 650093, China
- c. Engineering Training Center, Kunming University of Science and Technology, Kunming 650093, China

\* Corresponding author: [hujin@kmust.edu.cn](mailto:hujin@kmust.edu.cn) (Jin Hu); [20230152@kust.edu.cn](mailto:20230152@kust.edu.cn) (Tianyou Chen)

E-mail address: [hujin@kmust.edu.cn](mailto:hujin@kmust.edu.cn) (Jin Hu); [20230152@kust.edu.cn](mailto:20230152@kust.edu.cn) (Tianyou Chen)

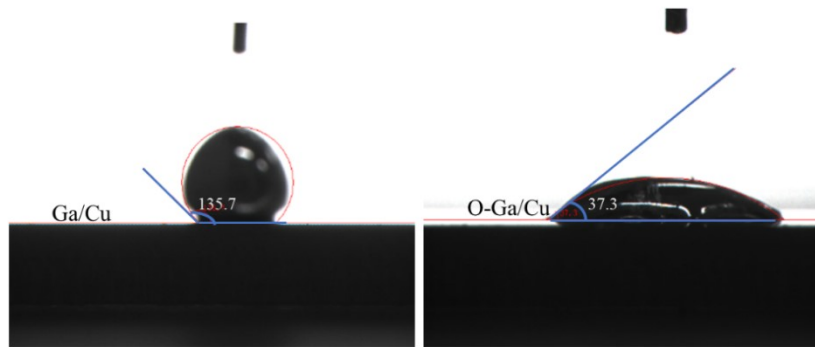

Figure. S1. the wetting angles of Ga/Cu and O-Ga/Cu.

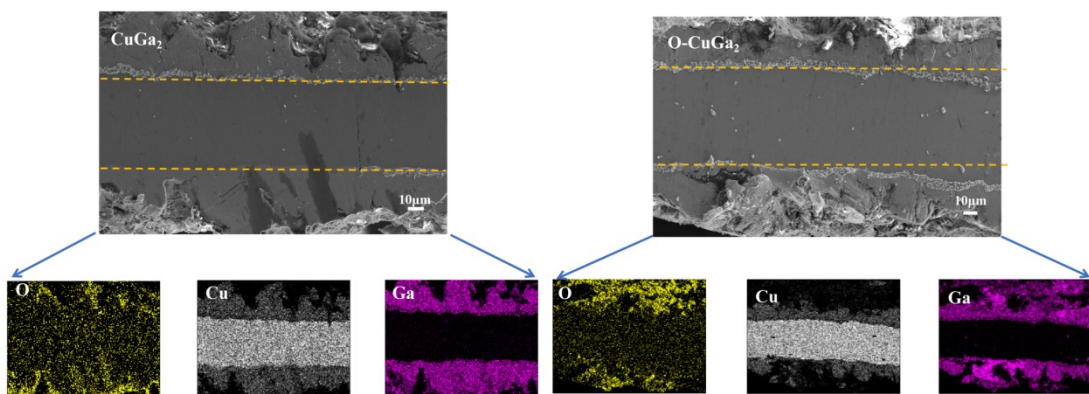

Figure. S2. Cross-sectional SEM maps and EDS elemental distribution of  $\text{CuGa}_2$  and  $\text{O-CuGa}_2$

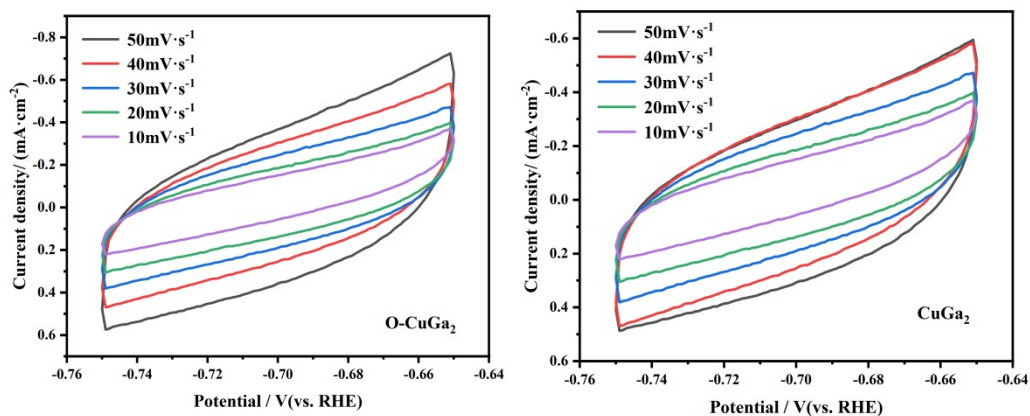

Figure.S3. Cyclic voltammograms of CuGa<sub>2</sub> and O-CuGa<sub>2</sub> at different potential scan rates under different conditions.

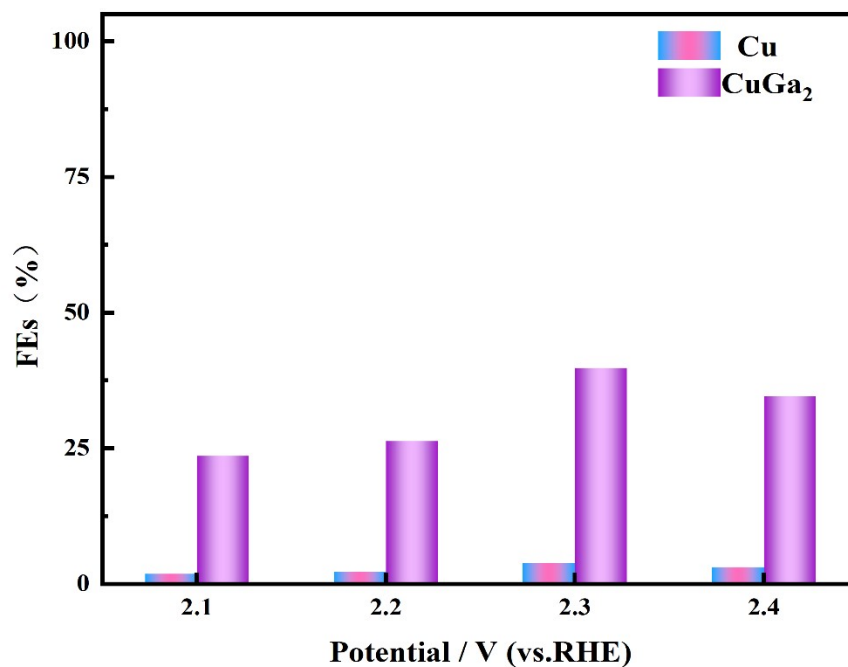

Figure . S4 Faraday efficiency plots for Cu and CuGa<sub>2</sub>

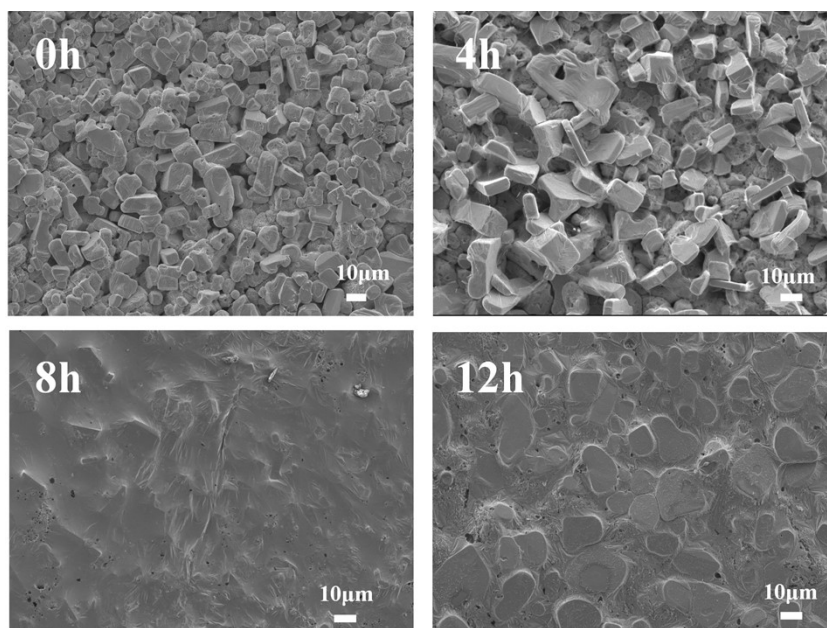

Figure. S5 SEM characterisation of O-CuGa<sub>2</sub> electrodes prepared from O-Ga with different oxidation times.

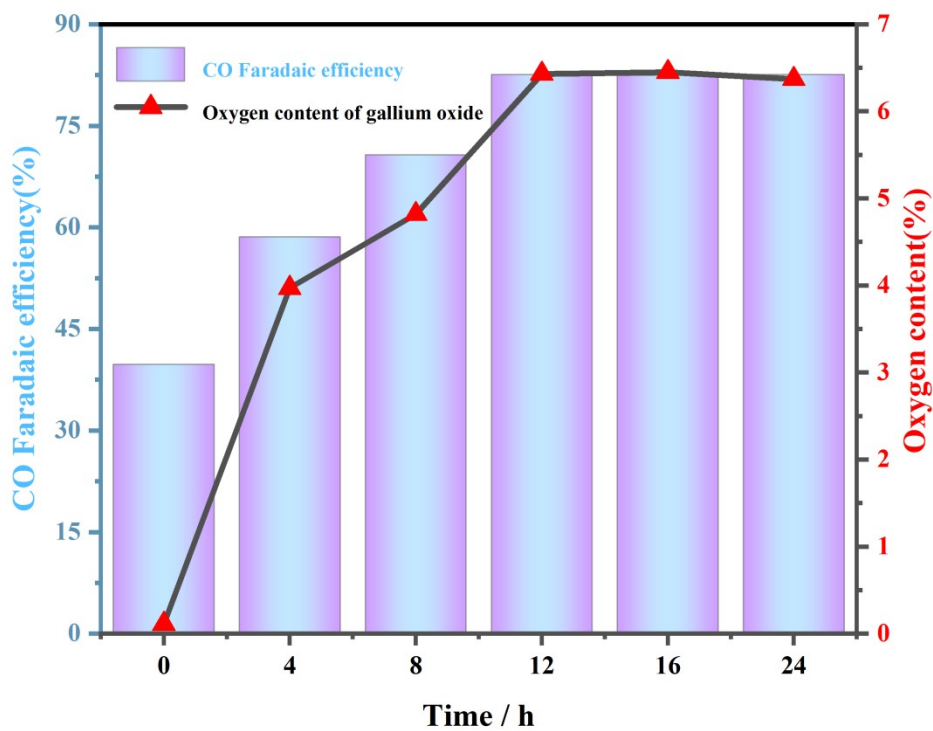

Figure. S6, Faraday efficiency plot of O-CuGa<sub>2</sub> catalysts with different oxygen contents

Table1. Rs and Rct of CuGa<sub>2</sub> and O-CuGa<sub>2</sub>

| Cathode             | Rs ( $\Omega$ ) | Rct ( $\Omega$ ) |
|---------------------|-----------------|------------------|
| CuGa <sub>2</sub>   | 4.1             | 14.5             |
| O-CuGa <sub>2</sub> | 2.7             | 10.1             |

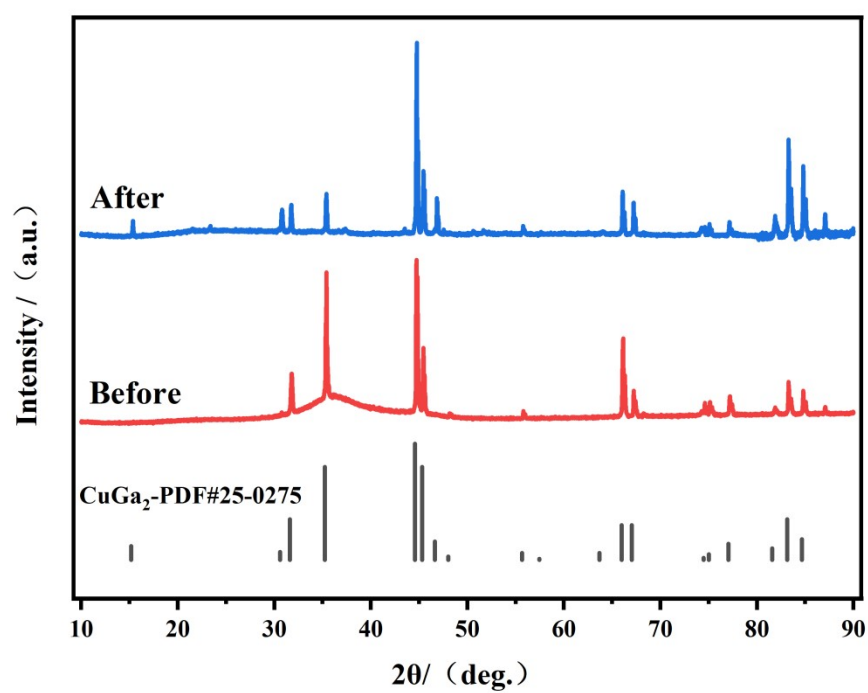

Figure. S7, XRD of the O-CuGa<sub>2</sub> electrode before and after the reaction.

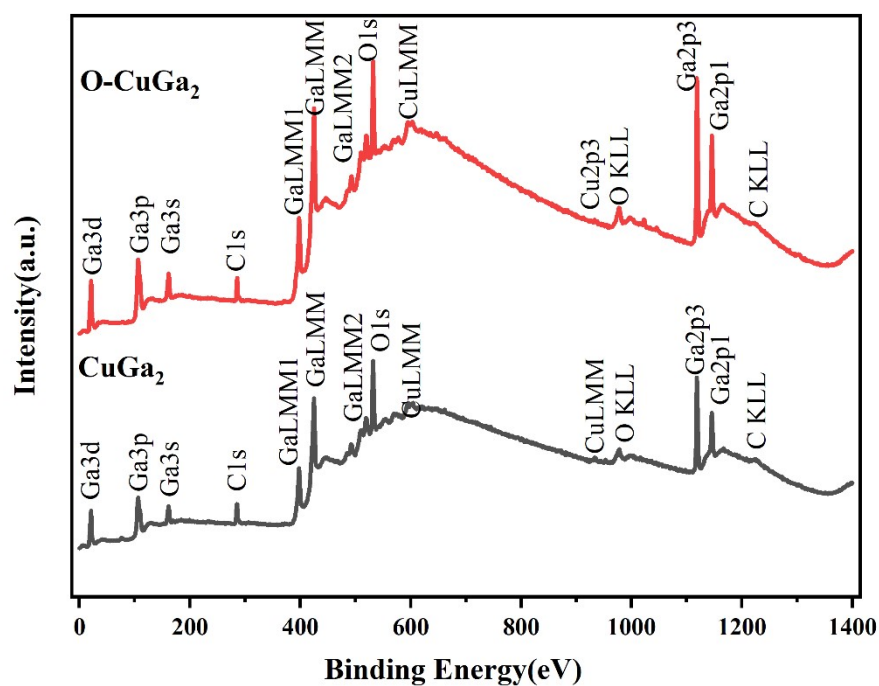

Figure .S8 XPS spectra of CuGa<sub>2</sub> and O-CuGa<sub>2</sub>

Table S2. Peak summary of the high resolution XPS analysis

| Region | Species                         | Binding energies (eV) | FWHM (CuGa <sub>2</sub> ) | FWHM (O-CuGa <sub>2</sub> ) | Area ratios (Cu Ga <sub>2</sub> ) | Area ratios (O-CuGa <sub>2</sub> ) |
|--------|---------------------------------|-----------------------|---------------------------|-----------------------------|-----------------------------------|------------------------------------|
| C 1s   | C-C                             | 284.8                 | 1.39                      | 1.43                        | 100%                              | 100%                               |
| O 1s   | Ga-O                            | 530.81                | 1.48                      | 1.48                        | 49.1%                             | 34.3%                              |
|        | O <sub>v</sub>                  | 531.7                 | 1.53                      | 1.75                        | 30.0%                             | 54.5%                              |
|        | H <sub>2</sub> O <sub>ads</sub> | 532.45                | 2.11                      | 3.09                        | 20.9%                             | 11.2%                              |
| Ga3d   | Ga <sup>0</sup>                 | 18.0                  | 1.09                      | 0.98                        | 18%                               | 11%                                |
|        | Ga <sub>2</sub> O <sub>3</sub>  | 20.4                  | 1.64                      | 1.88                        | 82%                               | 89%                                |
| Cu2p   | Cu                              | 932.9                 | 2.15                      | 2.02                        | 79.4%                             | 75.7%                              |
|        | Cu <sup>2+</sup>                | 952.5                 | 3.08                      | 2.44                        | 20.6%                             | 24.3%                              |

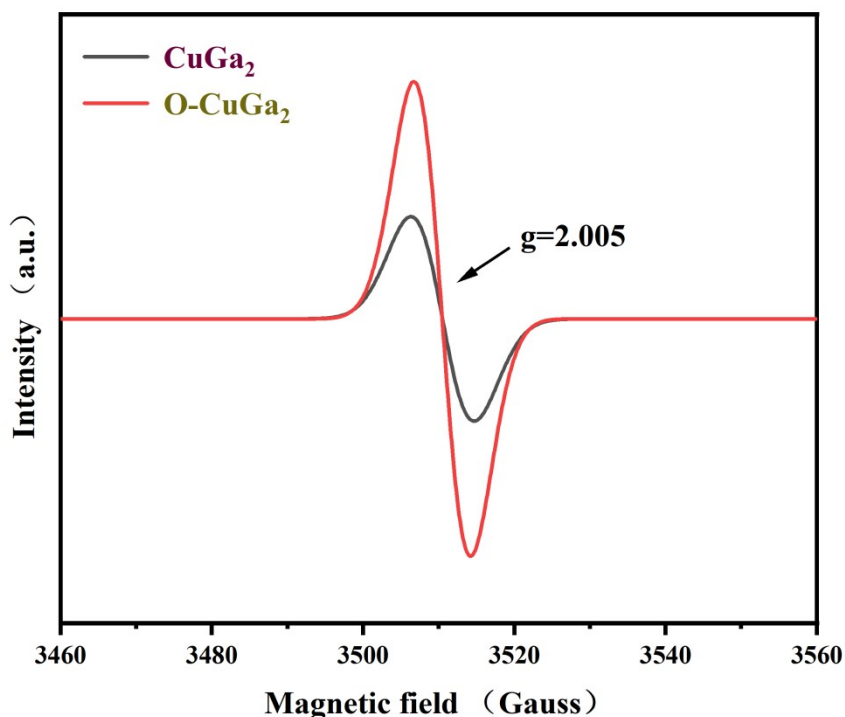

Figure. S9 EPR tests of  $\text{CuGa}_2$  and  $\text{O-CuGa}_2$ .

### Density functional theory (DFT) calculations.

The density functional theory computations were carried out by the CASTEP code, employing the ultrasoft pseudopotential<sup>1-3</sup>. The exchange correlation potential was represented by the Perdew-Burke-Ernzerhof (PBE) functional within the generalized gradient approximation (GGA)<sup>4</sup>. The  $\text{Cu}(111)$  and  $\text{CuGa}_2(102)$  surface with five atomic layers was established. Periodic boundary conditions were employed along x and y directions with a vacuum region of 20 Å. The cutoff energy for the plane-wave-basis expansion is set to be 450 eV, and the convergence tolerances of energy, force and maximum displacement are set to  $2.0 \times 10^{-5}$  eV/atom,  $5.0 \times 10^{-2}$  eV/Å and  $2.0 \times 10^{-3}$  Å, respectively. The  $k$ -points grid sampling of Monkhorst-Pack scheme was set at  $2 \times 2 \times 1$ . Meanwhile, the DFT-D correction method is used to describe the

long-range van der Waals interaction<sup>5</sup>. To calculate the d-band center,  $\frac{\int N(\epsilon)\epsilon d\epsilon}{\int N(\epsilon)d\epsilon}$  was conducted from 0 to  $-10.0$  eV, where  $N(\epsilon)$  is the density of states.

### References:

- 1 G. Kresse and D. Joubert, *Phys. Rev. B*, 1999, **59**, 1758–1775.
- 2 G. Kresse and J. Furthmüller, *Computational Materials Science*, 1996, **6**, 15–50.
- 3 G. Kresse and J. Furthmüller, *Phys. Rev. B*, 1996, **54**, 11169–11186.
- 4 J. P. Perdew, K. Burke and M. Ernzerhof, *Phys. Rev. Lett.*, 1996, **77**, 3865–3868.
- 5 S. Grimme, J. Antony, S. Ehrlich and H. Krieg, *The Journal of Chemical Physics*, 2010, **132**, 154104.
